# Supplementary material for: Effects of Incorporating Alkaline Hydrogen Peroxide Treated Sugarcane Fibre on The Physical Properties and Glycemic Potency of White Bread
Source: MDPI journal article supplement (doi:10.3390/foods12071460), 2023-03-29
Supplement: s1 [file s1]

## Supplementary information:

### Effects of Incorporating Alkaline Hydrogen Peroxide Treated Sugarcane Fibre on The Physical Properties and Glycemic Potency of White Bread

#### **Authors:**

**Fatin Natasha Binte Abdul Halim <sup>1</sup>, Afsaneh Taheri <sup>1</sup>, Zawanah Abdol Rahim Yassin <sup>1</sup>, Kai Feng Chia <sup>1</sup>, Kelvin Kim Tha Goh <sup>2</sup>, Suk Meng Goh <sup>1</sup> and Juan Du <sup>1,\*</sup>**

<sup>1</sup> Food, Chemical and Biotechnology Cluster, Singapore Institute of Technology, 10 Dover Drive, Singapore 138683, Singapore

<sup>2</sup> School of Food & Advanced Technology, Massey University, Private Bag 11222, Palmerston North 4410, New Zealand

\* Correspondence: du.juan@singaporetech.edu.sg

**Table S1.** PMI for different methods used in different paper.

|                               | Our method                                    | Sangnark & Noomhorm [18]   | Alencar et al. [57]         |
|-------------------------------|-----------------------------------------------|----------------------------|-----------------------------|
| AHP treatment condition       | 12.6% sugarcane fibre, 0.5-5 h, washed twice. | 1% sugarcane bagasse, 12 h | 10% corn staver biomass, 1h |
| Process Mass Efficiency (PMI) | 18.4                                          | 101 – 200                  | 29.2 – 34.8                 |

$$\text{Process Mass Intensity [58]} = \frac{\text{Total mass in process steps (kg)}}{\text{Mass of products (kg)}} \quad \text{Eq. (S1)}$$

**Table S2.** Parameters to determine particle size of samples.

|                             |                                 |
|-----------------------------|---------------------------------|
| Sample Identification       | Sugarcane Fiber                 |
| Particle Type               | Spherical                       |
| Material                    | Cellulose                       |
| Refractive Index            | 1.4683 [59]                     |
| Absorption Index            | 0.001                           |
| Dispersant                  | Water                           |
| Dispersant Refractive Index | 1.33                            |
| Measurement Duration        | Background: 10 s<br>Sample: 5 s |
| Sequence                    | 5                               |
| Measurement Obscuration     | 5 – 15 %                        |

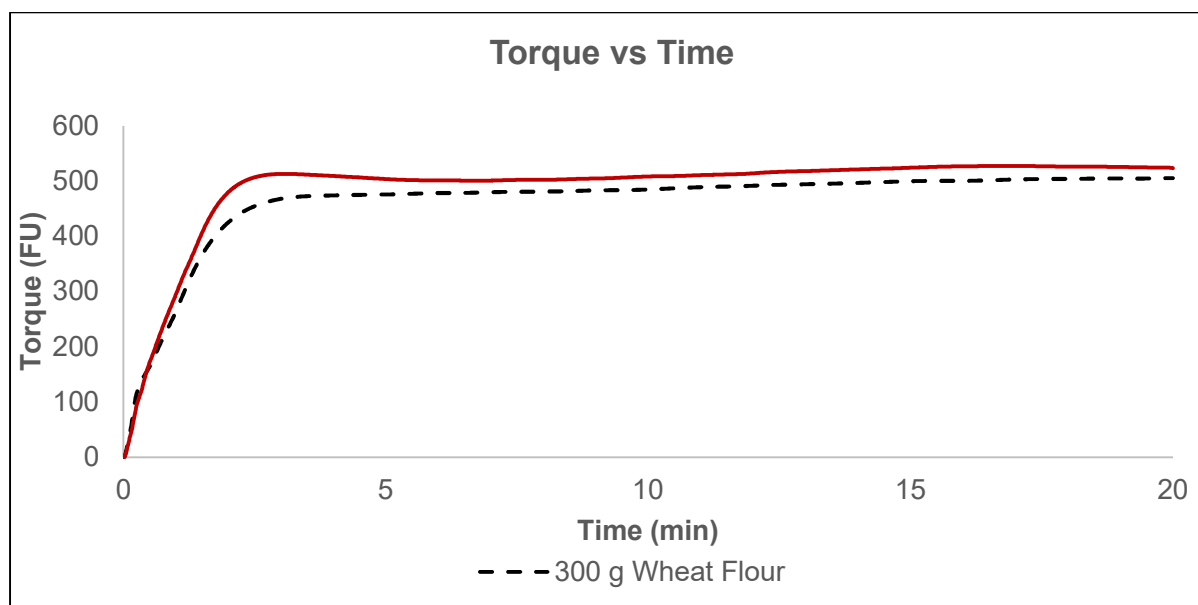**Fig S1.** Farinograph analysis indicating the dough development of flour samples over a 20 min mixing regime.**Table S3.** Dough extensibility test parameters on texture analyzer.

| Parameters      | Settings   |
|-----------------|------------|
| Test Mode       | Tension    |
| Pre-Test Speed  | 2.00 mm/s  |
| Test Speed      | 3.00 mm/s  |
| Post-Test Speed | 10.00 mm/s |
| Distance        | 90 mm      |
| Trigger Force   | 5.0 g      |

**Table S4.** Double compression test parameters on texture analyzer.

| Parameters           | Settings                         |
|----------------------|----------------------------------|
| Test Mode            | Strain – Double Compression Test |
| Pre-Test Speed       | 1.00 mm/s                        |
| Test Speed           | 2.00 mm/s                        |
| Post-Test Speed      | 2.00 mm/s                        |
| Initial Probe Height | 40 mm                            |
| Trigger Force        | 5.0 g                            |
| Time Gap             | 5.0 s                            |
| Strain               | 40 %                             |

**Table S5.** Total iAUC, relative glycemic potency (RGP), and rapidly digestible starch (RDS) values of bread samples.

| Samples       | Total iAUC (g.min)         | RGP (g/100g bread)       | RDS (%)                  |
|---------------|----------------------------|--------------------------|--------------------------|
| Reference     | 1431.4 ± 14.0 <sup>a</sup> | 38.3 ± 0.3 <sup>a</sup>  | 43.6 ± 3.2 <sup>a</sup>  |
| Untreated SCF | 807.2 ± 35.4 <sup>bc</sup> | 23.0 ± 0.9 <sup>b</sup>  | 28.3 ± 0.3 <sup>bc</sup> |
| 0.5h AHP SCF  | 908.7 ± 25.4 <sup>b</sup>  | 22.4 ± 0.6 <sup>bc</sup> | 30.3 ± 1.1 <sup>b</sup>  |
| 1h AHP SCF    | 753.6 ± 51.7 <sup>c</sup>  | 19.3 ± 0.6 <sup>d</sup>  | 24.3 ± 0.3 <sup>c</sup>  |
| 3h AHP SCF    | 704.0 ± 59.2 <sup>c</sup>  | 19.0 ± 1.0 <sup>d</sup>  | 23.4 ± 0.6 <sup>c</sup>  |
| 5h AHP SCF    | 723.1 ± 7.9 <sup>c</sup>   | 19.8 ± 0.1 <sup>cd</sup> | 23.7 ± 0.6 <sup>c</sup>  |

## References

57. Alencar, B. R. A., Reis, A. L. S., de Souza, R. D. F. R., Morais Jr, M. A., Menezes, R. S. C., & Dutra, E. D. (2017). Recycling the liquid fraction of alkaline hydrogen peroxide in the pretreatment of corn stover. *Bioresource technology*, 241, 928-935.
58. Monteith, E. R., Mampuys, P., Summerton, L., Clark, J. H., Maes, B. U., & McElroy, C.

- R. (2020). Why we might be misusing process mass intensity (PMI) and a methodology to apply it effectively as a discovery level metric. *Green Chemistry*, 22(1), 123-135. <https://doi.org/10.1039/C9GC01537J>.
59. Sultanova, N., Kasarova, S., & Nikolov, I. (2009). Dispersion properties of optical polymers. *Acta Physica Polonica A*, 116(4), 585-587. <http://dx.doi.org/10.12693/APhysPolA.116.585>
